# Supplementary material for: Salt-induced Fmoc-tripeptide supramolecular hydrogels: a combined experimental and computational study of the self-assembly
Source: Royal Society of Chemistry journal article supplement (doi:10.1039/d4nr00335g), 2024-01-01
Supplement: d4nr00335g1.pdf [file d4nr00335g1.pdf]

## Supplementary Information

# Salt-induced Fmoc-tripeptide Supramolecular Hydrogels: A Combined Experimental and Computational Study of the Self-assembly

*Miryam Criado-Gonzalez,<sup>a,b\*</sup> Mario Iván Peñas,<sup>a,b</sup> Florent Barbault,<sup>c</sup> Alejandro J. Müller,<sup>b,d</sup> Fouzia Boulmedais,<sup>e</sup> Rebeca Hernández<sup>a</sup>*

<sup>a</sup> Instituto de Ciencia y Tecnología de Polímeros (ICTP-CSIC), 28006 Madrid, Spain

<sup>b</sup> POLYMAT and Department of Polymers and Advanced Materials: Physics, Chemistry and Technology, Faculty of Chemistry, University of the Basque Country UPV/EHU, 20018 Donostia-San Sebastián, Spain

<sup>c</sup> ITODYS, Université de Paris, CNRS, F75006 Paris, France

<sup>d</sup> Ikerbasque, Basque Foundation for Science, Plaza Euskadi 5, 48009 Bilbao, Spain

<sup>e</sup> Université de Strasbourg, CNRS, Institut Charles Sadron (UPR 22), 67034 Strasbourg, France

\*E-mail: [miryam.criado@ehu.es](mailto:miryam.criado@ehu.es)

## High-Performance Liquid Chromatography (HPLC) of Fmoc-FFpY

Analytical column type: Phenomenex Luna 3u C18(2) 3 $\mu$ m (4.6  $\times$  150mm  $\times$  3 $\mu$ m).

Detector wavelength: 220 nm

Pump A: 0.1% trifluoroacetic in 100% water

Pump B: 0.1% trifluoroacetic in 100% acetonitrile

Elution conditions: 20% ACN+ 80% H<sub>2</sub>O

Flow rate: 0.8 mL/min

Injection volume: 30  $\mu$ L

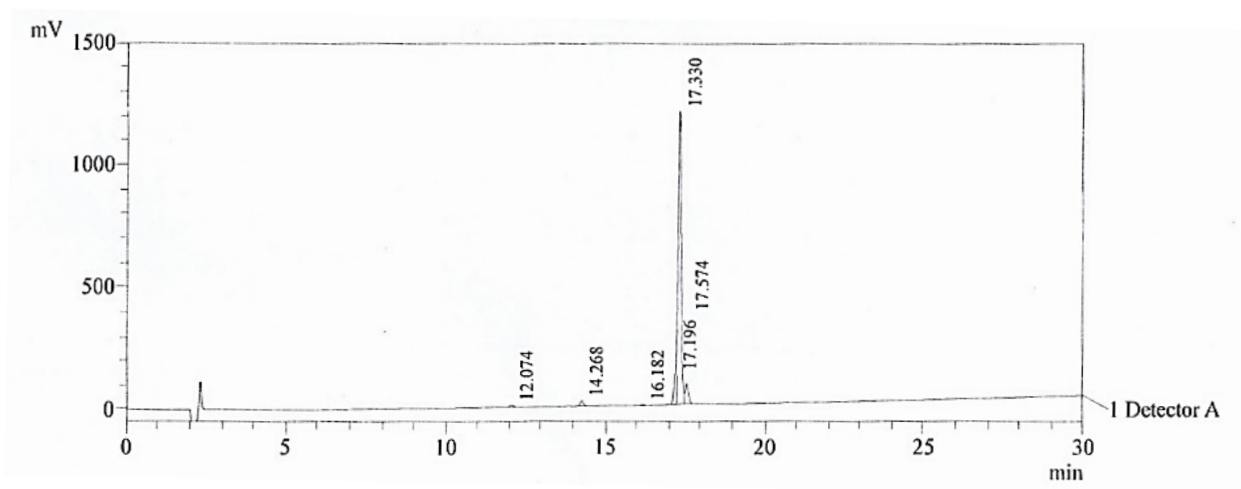

**Fig. S1.** HPLC spectrum of Fmoc-FFpY.

**Table S1.** HPLC data of Fmoc-FFpY.

| Peak  | Retention time (min) | Area    | Height  | % Area  |
|-------|----------------------|---------|---------|---------|
| 1     | 12.074               | 40621   | 6136    | 0.413   |
| 2     | 14.268               | 154320  | 22065   | 1.569   |
| 3     | 16.182               | 21258   | 3320    | 0.216   |
| 4     | 17.196               | 549682  | 122487  | 5.588   |
| 5     | 17.330               | 8493392 | 1195352 | 86.341  |
| 6     | 17.574               | 577749  | 81534   | 5.873   |
| Total |                      | 9837022 | 1430893 | 100.000 |

## Mass spectrometry of Fmoc-FFpY

Dissolution method: 3% HAC + 25% ACN+ 72% H<sub>2</sub>O

Nebulizing Gas Flow: 1.5 mL/min

Detector: -0.2 kv

CDL Temperature: 250 °C

Flow rate: 0.2 mL/min

Injection volume: 1 μL

Block Temperature: 200 °C

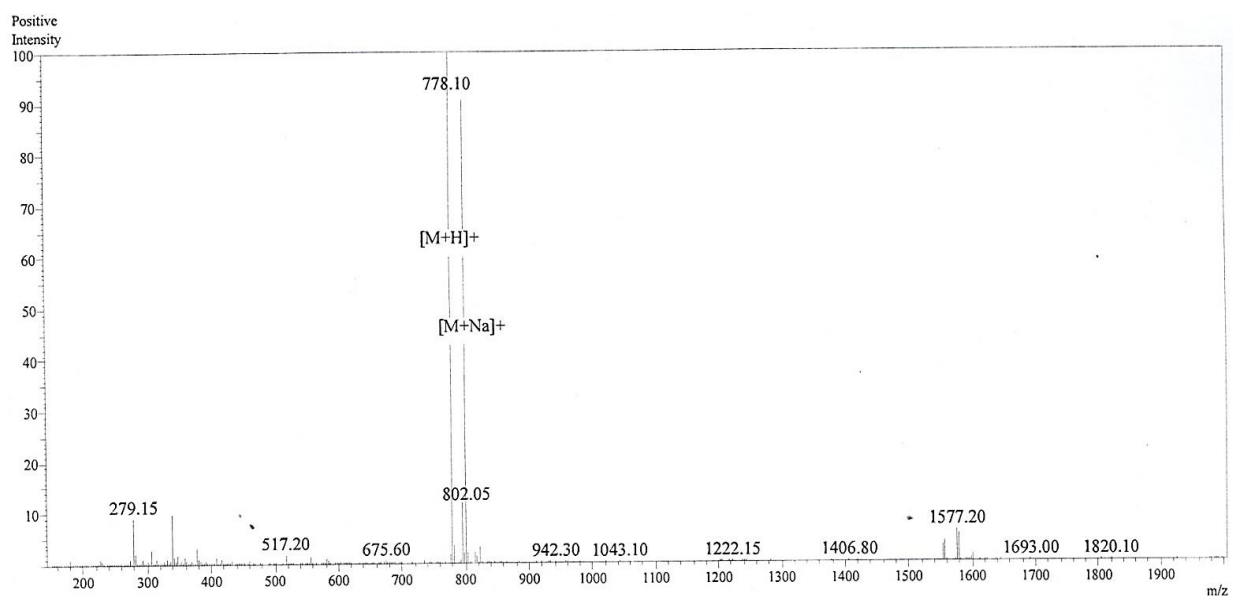

**Fig. S2.** Mass spectrum of Fmoc-FFpY. The observed molecular weight is 777.10 Da (\*the theoretical molecular weight is 777.54 Da).

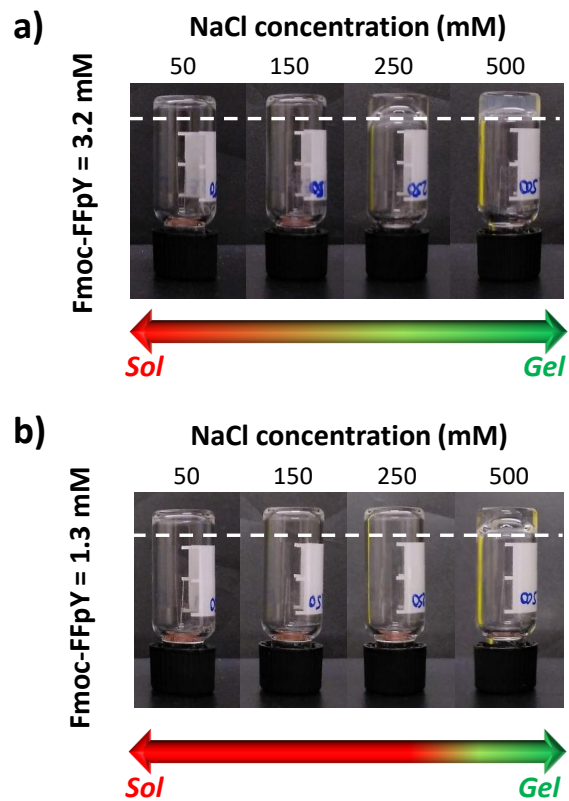

**Fig. S3.** Inverted tube tests of Fmoc-FFpY/Na<sup>+</sup> mixtures formed at a fixed concentration of Fmoc-FFpY of (a) 3.2 and (b) 1.3 mM after 24 h. Dashed lines are a guide to the eye.

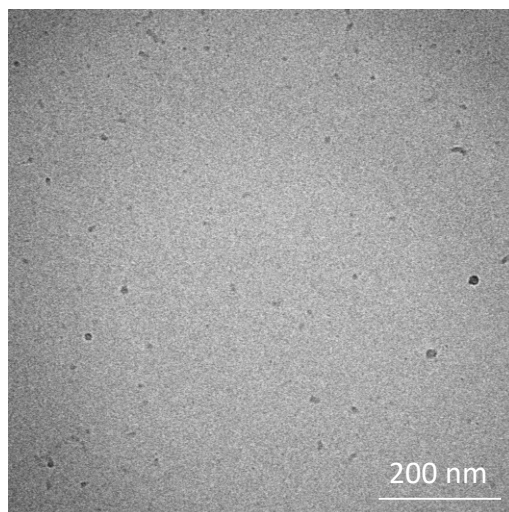

**Fig. S4.** TEM micrograph of negatively stained Fmoc-FFpY6.4 in solution.

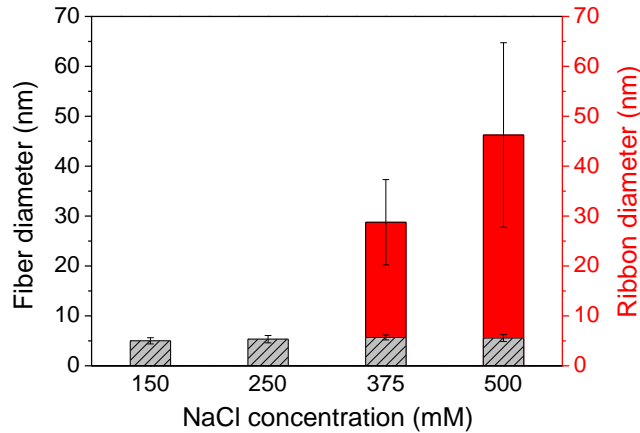

**Fig. S5.** Fiber (grey bars) and ribbon diameters (red bars) of Fmoc-FFpY6.4/Na<sup>+</sup> hydrogels prepared in different NaCl concentrations, obtained by measuring the average of 20 fibers or ribbons from TEM micrographs using the software ImageJ.

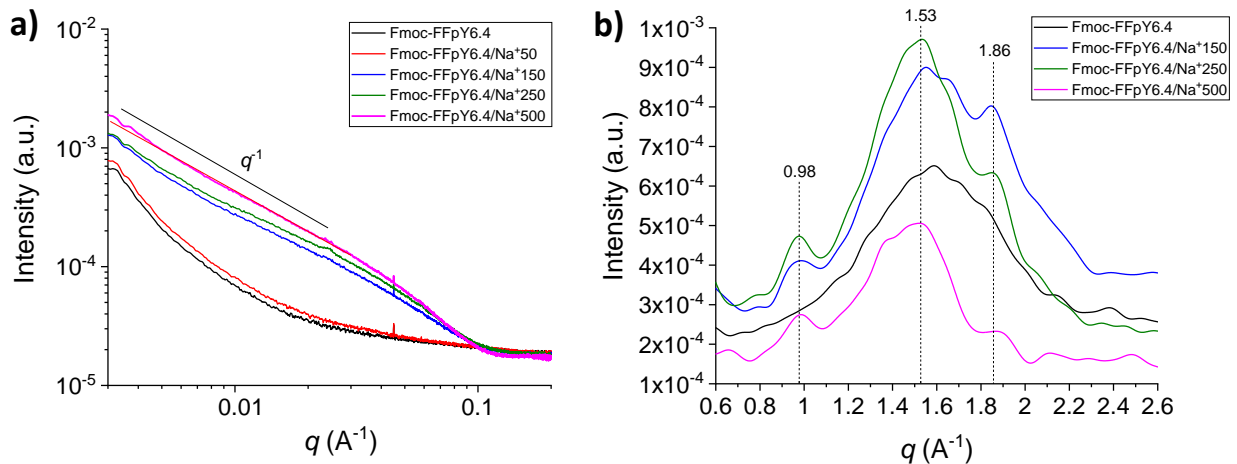

**Fig. S6.** (a) SAXS scattering curves of Fmoc-FFpY in solution in the absence (black curve) and the presence of different NaCl concentrations: Fmoc-FFpY6.4/Na<sup>+</sup>50 (red curve), Fmoc-FFpY6.4/Na<sup>+</sup>150 (blue curve), Fmoc-FFpY6.4/Na<sup>+</sup>250 (green curve), and Fmoc-FFpY6.4/Na<sup>+</sup>500 (pink curve). For easier visualization, the Fig. displays the  $q^{-1}$  relationship at low  $q$  angles in SAXS curves. (b) WAXS scattering curves of Fmoc-FFpY in solution in the absence (black curve) and the presence of different NaCl concentrations: Fmoc-FFpY6.4/Na<sup>+</sup>150 (blue curve), Fmoc-FFpY6.4/Na<sup>+</sup>250 (green curve), and Fmoc-FFpY6.4/Na<sup>+</sup>500 (pink curve).

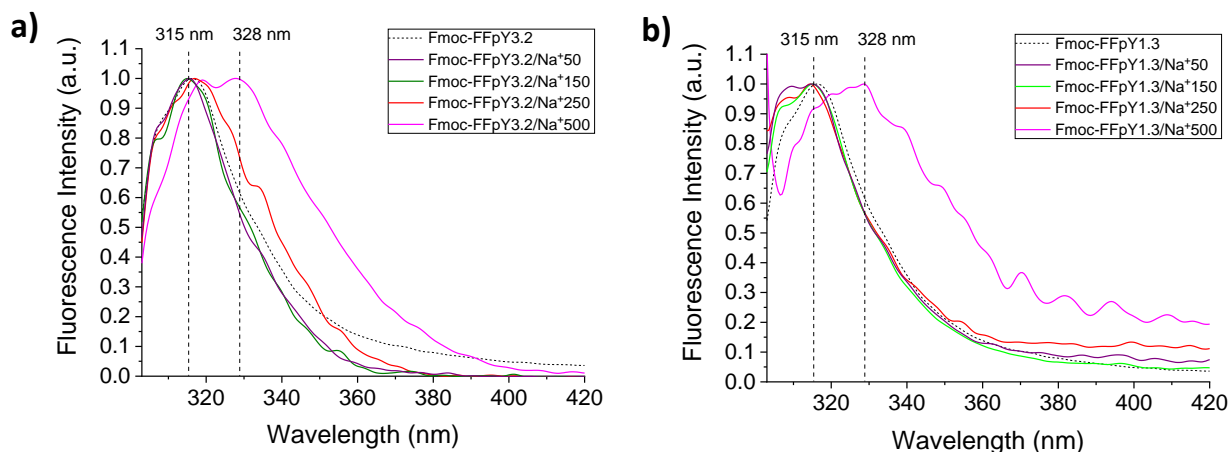

**Fig. S7.** Fluorescence spectra of different Fmoc-FFpY/Na<sup>+</sup> mixtures formed at a fixed concentration of Fmoc-FFpY of (a) 3.2 mM and (b) 1.3 mM after 24 h, and in different NaCl concentrations: Fmoc-FFpY/Na<sup>+</sup>50 (purple curve), Fmoc-FFpY/Na<sup>+</sup>150 (green curve), Fmoc-FFpY/Na<sup>+</sup>250 (red curve), and Fmoc-FFpY/Na<sup>+</sup>500 (pink curve).

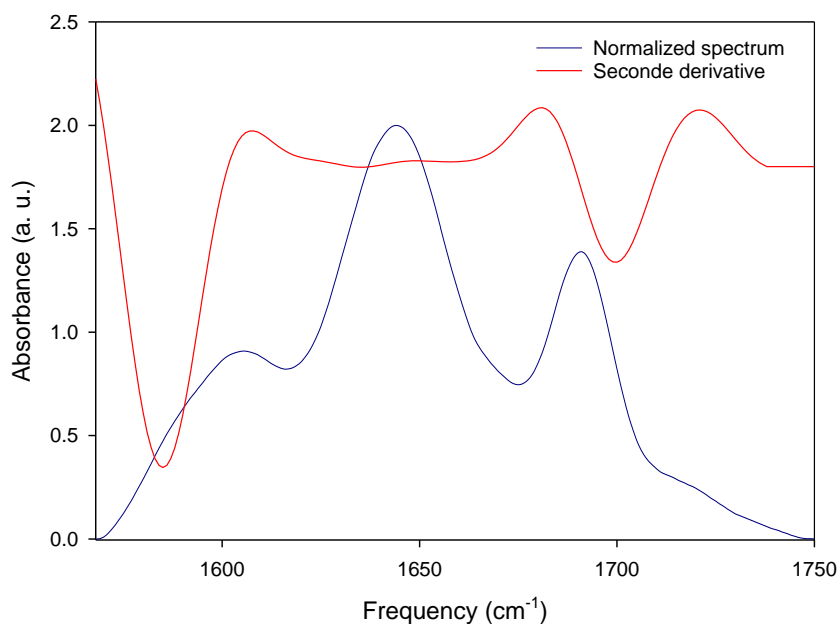

**Fig. S8.** FTIR normalized spectrum of Fmoc-FFpY6.4/Na<sup>+</sup>500 hydrogel and its second derivative spectra obtained by using OPUS 7.5 software. The minimum position, 1585, 1616, 1635, 1661, and 1698 cm<sup>-1</sup>, were used for the decomposition of the region.

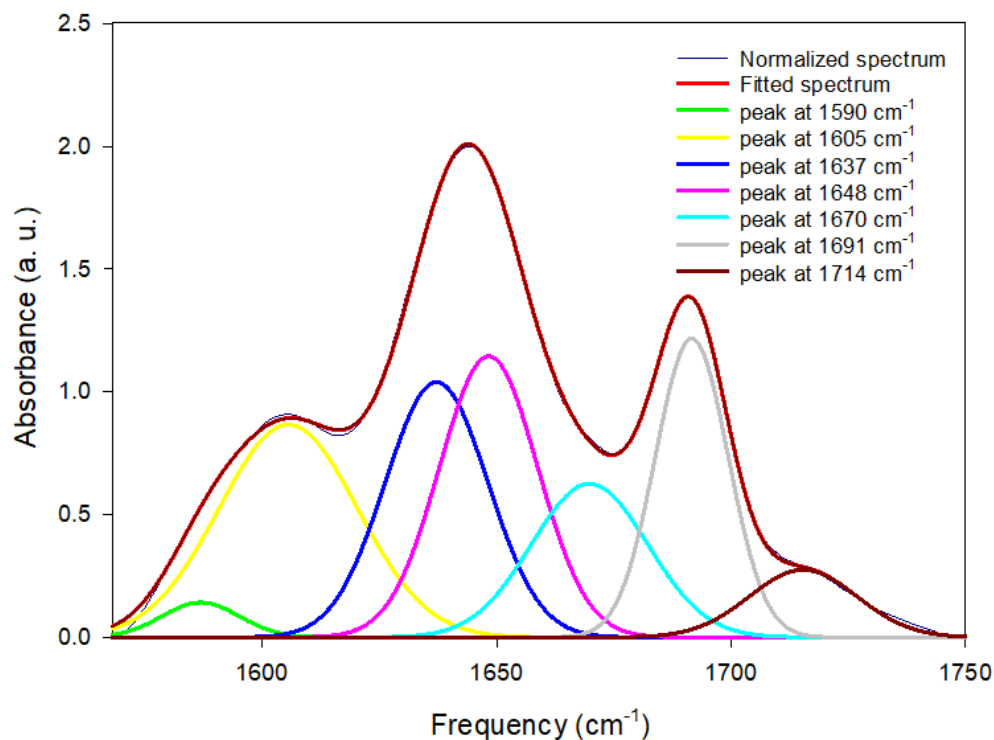

**Fig. S9.** FTIR normalized spectrum of the amide I band region of Fmoc-FFpY6.4/Na<sup>+</sup>500 hydrogel. This region was fitted by multiple Gaussian peaks using OPUS 7.5 software.

**Table S2.** The relative content of the different secondary structure contributions of the amide I band of Fmoc-FFpY6.4/Na<sup>+</sup>500 hydrogel. The peaks were attributed according to Xing et al. *Angew. Chem. Int. Ed* 2018, 57, 1537 and T. H Kim et al. *Arch. Pharm. Res.* 2007, 30, 381.

| Structure                        | Peaks (cm <sup>-1</sup> ) | Contribution in the amide I band (%) |
|----------------------------------|---------------------------|--------------------------------------|
| C=O of COO <sup>-a</sup>         | 1591                      | -                                    |
| β-sheet                          | 1610                      | 21                                   |
| Random                           | 1637                      | 30                                   |
| α-helix                          | 1649                      | 29                                   |
| Antiparallel β-sheet             | 1670                      | 20                                   |
| Carbamate                        | 1692                      | -                                    |
| C=O carbonyl involved in H bonds | 1714                      | -                                    |

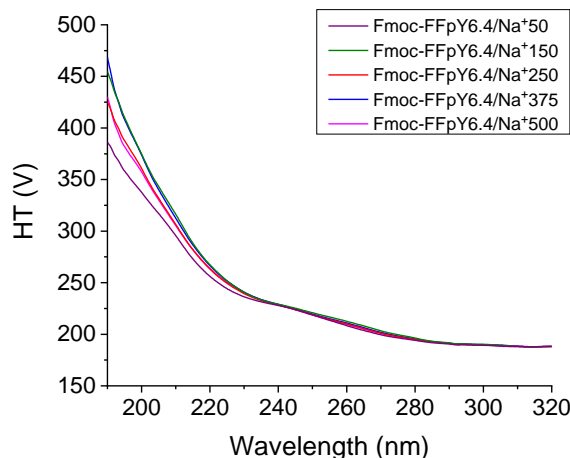

**Fig. S10.** Voltage curves of CD measurements of Fmoc-FFpY/Na<sup>+</sup> mixtures: Fmoc6.4/Na<sup>+</sup>50, Fmoc6.4/Na<sup>+</sup>150, Fmoc6.4/Na<sup>+</sup>250, Fmoc6.4/Na<sup>+</sup>375, and Fmoc6.4/Na<sup>+</sup>500.

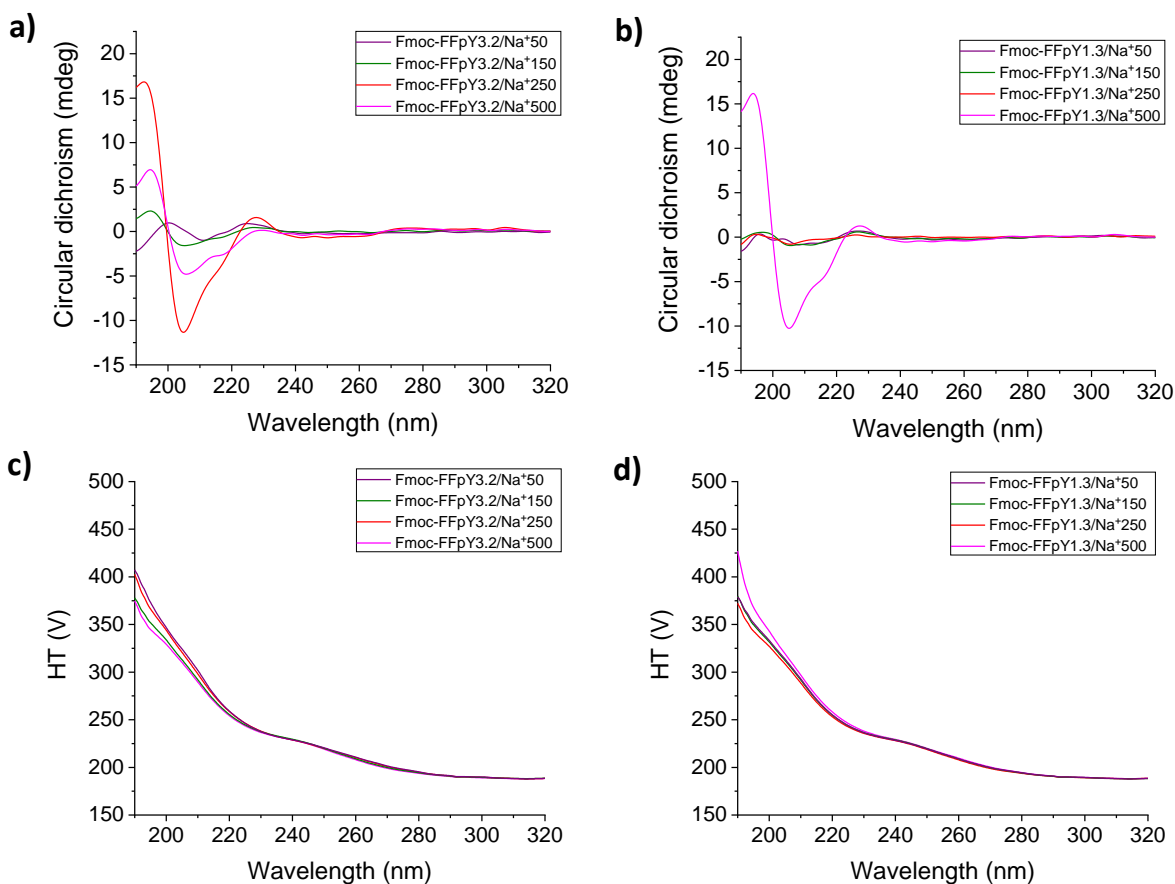

**Fig. S11.** (a, b) CD spectra and (c, d) voltage curves of Fmoc-FFpY/Na<sup>+</sup> mixtures formed at a fixed concentration of Fmoc-FFpY of (a, c) 3.2 and (b, d) 1.3 mM after 24 h, and different NaCl concentrations: Fmoc-FFpY/Na<sup>+</sup>50 (purple curve), Fmoc-FFpY/Na<sup>+</sup>150 (green curve), Fmoc-FFpY/Na<sup>+</sup>250 (red curve), Fmoc-FFpY/Na<sup>+</sup>375 (blue curve), and Fmoc-FFpY/Na<sup>+</sup>500 (pink curve).



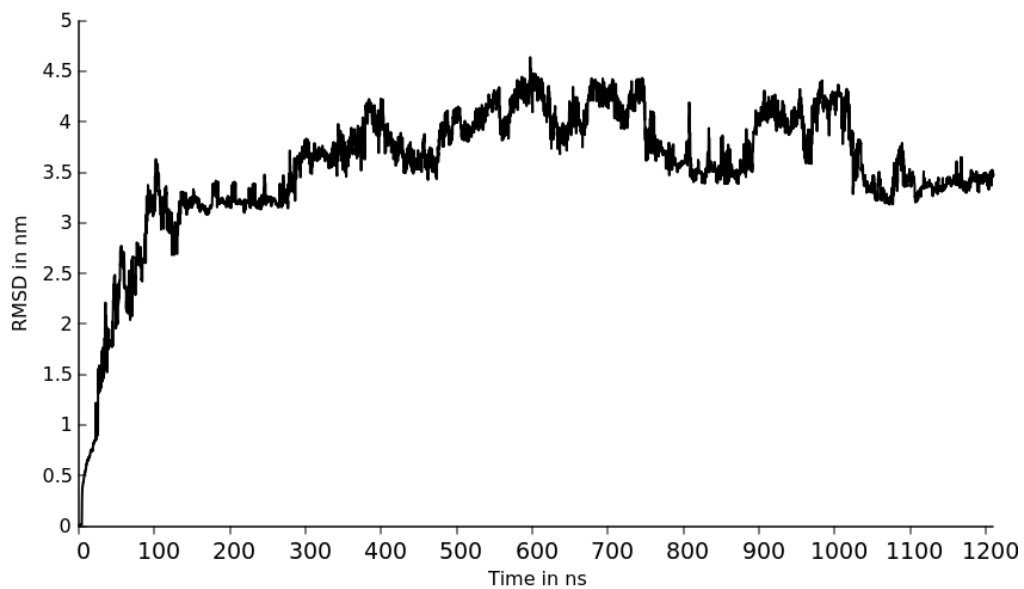

**Fig. S12.** Example of RMSD curves for a MD simulation investigating the structural assembly of 40 Fmoc-FFpY peptide units.

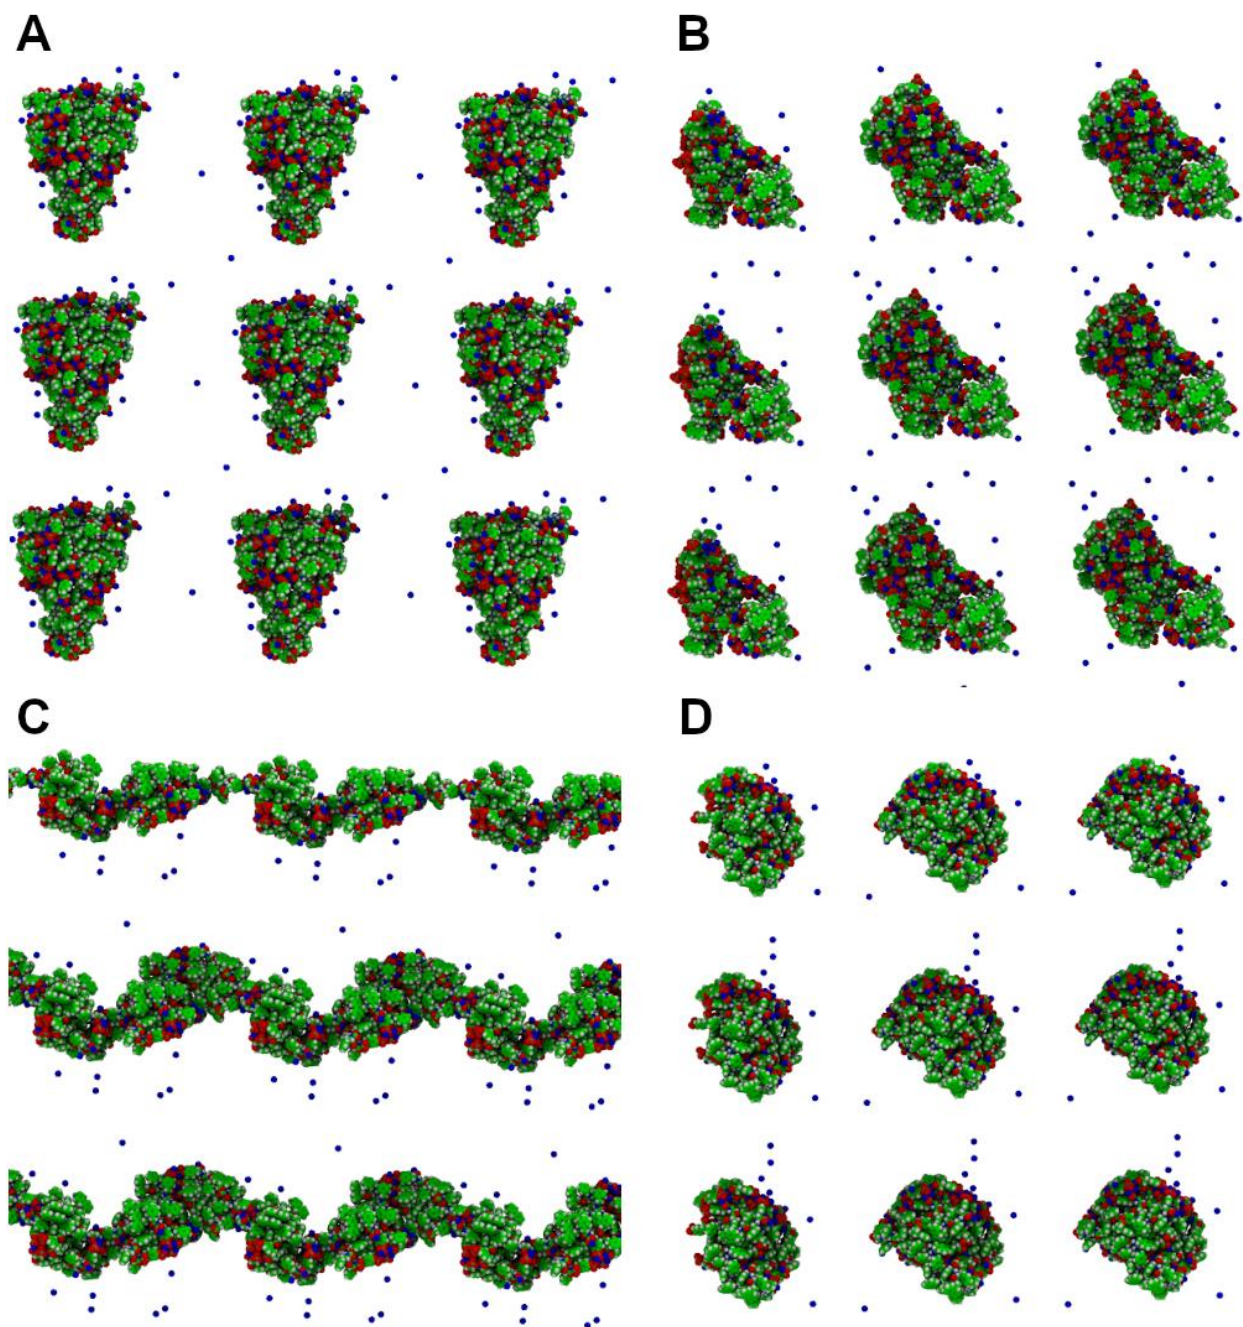

**Fig. S13.** Final structures obtained for the four replicas of MD simulations at 250 mM of NaCl. 3 of the studied system collapsed while one, C, take advantage of the periodic conditions to generate a ribbon-like structuration.

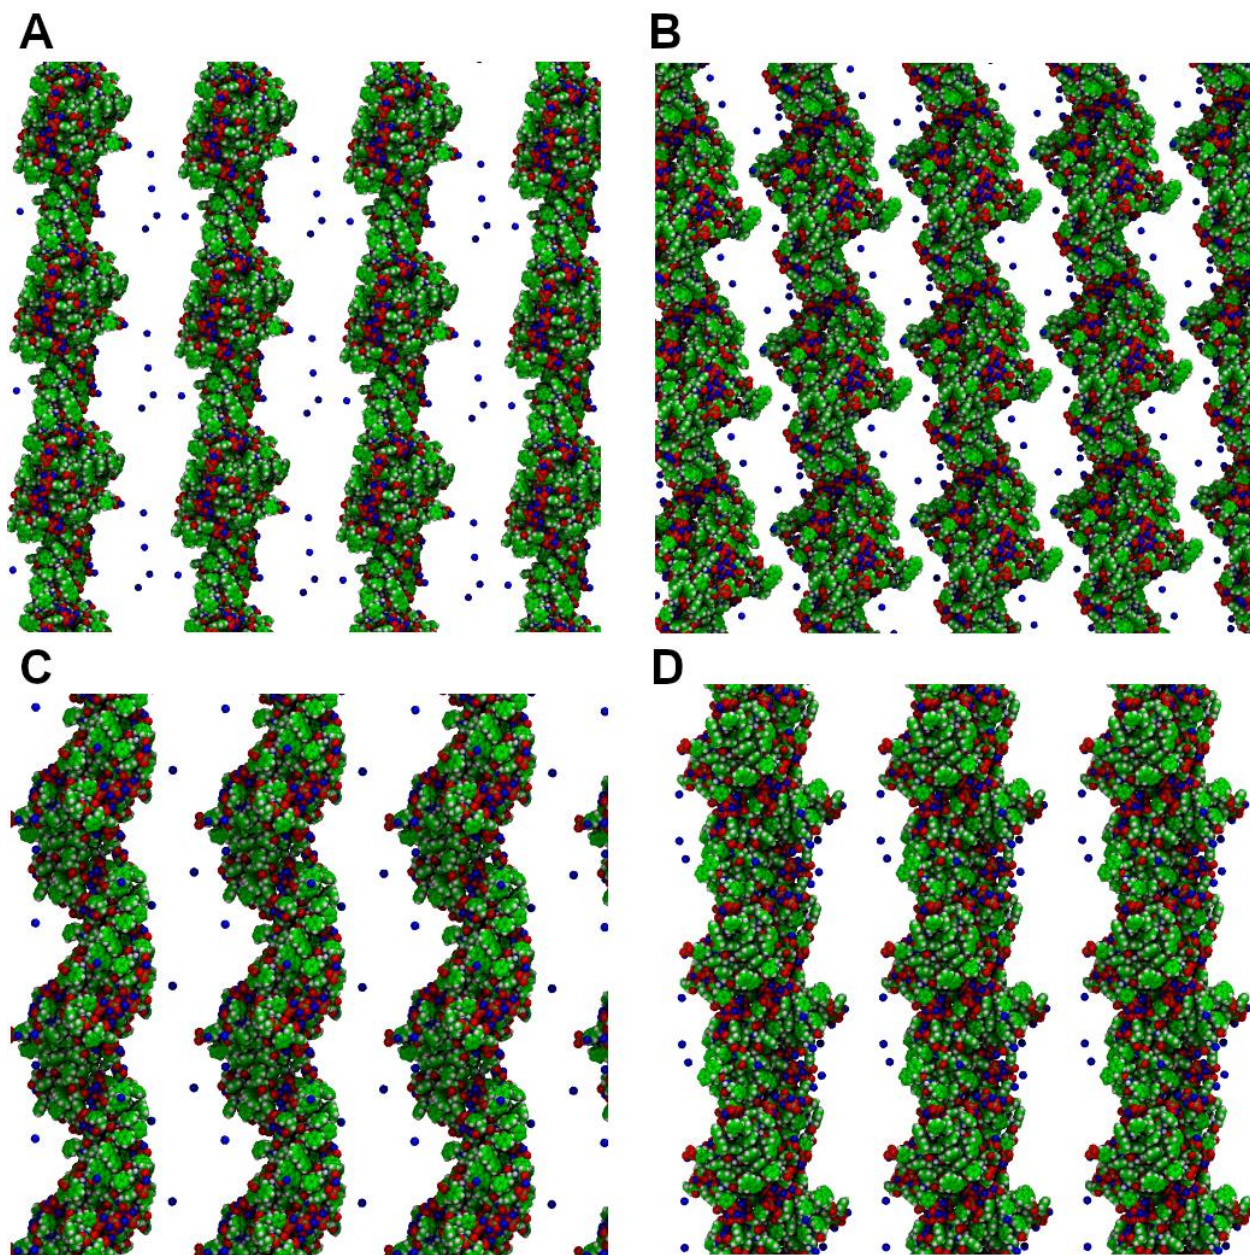

**Fig. S14.** Final structures obtained for the four replicas of MD simulations at 500 mM of NaCl. For each simulated system, a ribbon-like structure is observed.

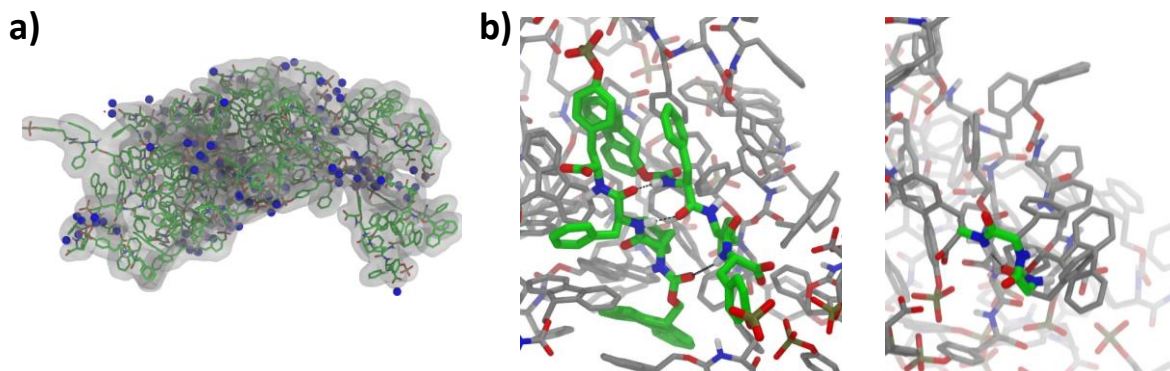

**Fig. S15.** Molecular Dynamics simulation where 40 Fmoc-FFpY units are assembled in presence of 500 mM NaCl. (a) Representation of the localization of  $\text{Na}^+$  ions (blue spheres) in the vicinity of the 40 Fmoc-FFpY units assembled. (b)  $\beta$ -sheet structure involving 3 hydrogen bonds (left) and  $\alpha$ -helix structure involving one intramolecular hydrogen bond (right). In the right Fig. only the peptide structure is shown in green color to distinguish the helicoidal organization.

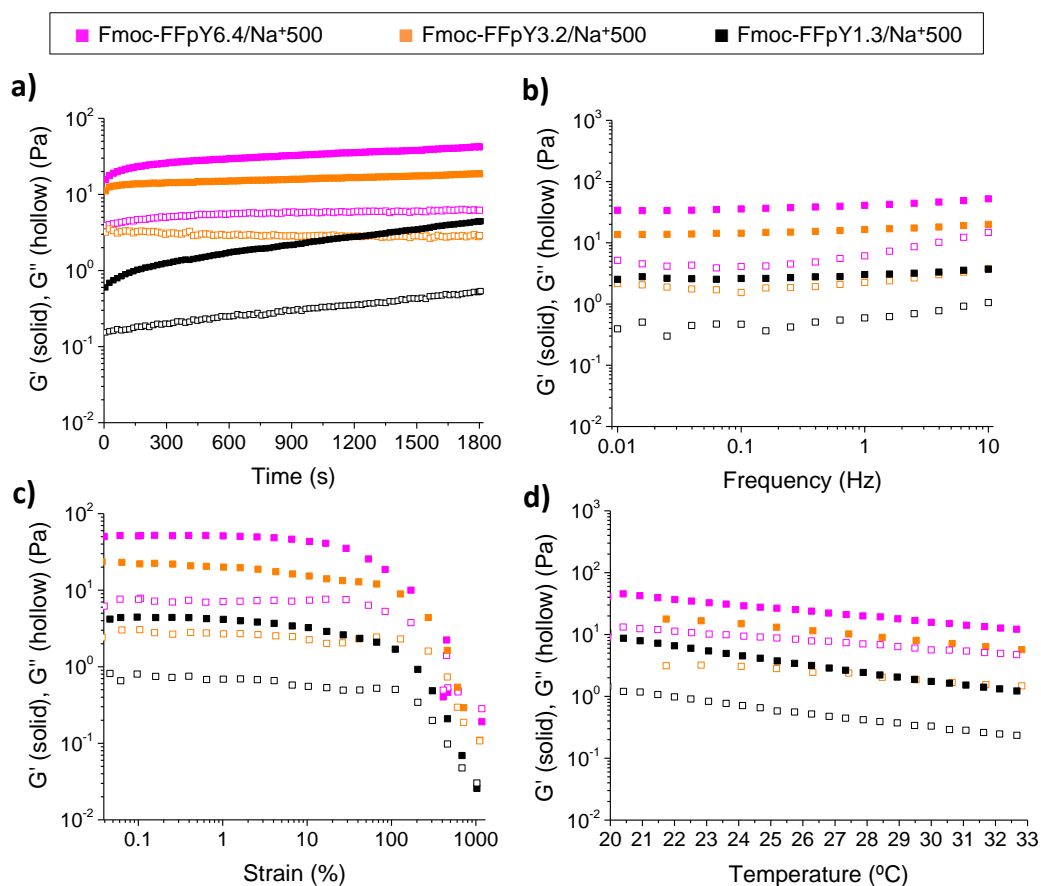

**Fig. S16.** Rheological properties of Fmoc-FFpY/ $\text{Na}^+$ 500 hydrogels prepared at 1.3 (■), 3.2 mM (■), and 6.4 mM (■) Fmoc-FFpY. Storage modulus ( $G'$  - solid symbols) and loss modulus ( $G''$  - hollow symbols) as a function of the (a) time (1 Hz, 1% strain), (b) frequency (0.01–10 Hz, 1% strain), and (c) strain (0.01–1000%, 1 Hz) at 20 °C, and (d) temperature (1% or 1% strain).

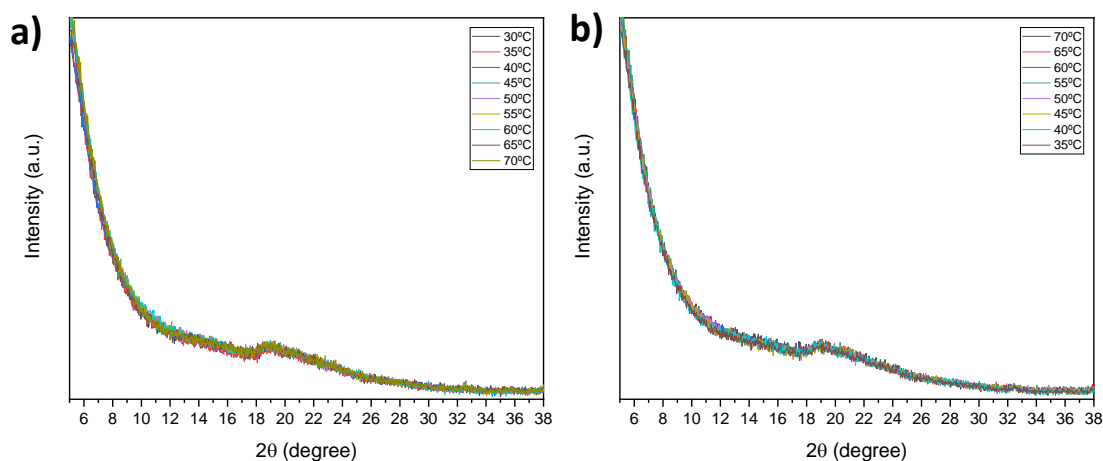

**Fig. S17.** X-ray diffractograms of Fmoc-FFpY in powder during (a) the heating process and (b) the subsequent cooling. X-ray diffractograms of Fmoc-FFpY in the powder were recorded with a Philips X'Pert PRO with Cu K $\alpha$  radiation in the Bragg-Brentano geometry in the range of  $2\theta = 5$ - $38^\circ$ . Measurements were first performed during heating from  $30^\circ\text{C}$  up to  $70^\circ\text{C}$  at a heating rate of  $5^\circ\text{C min}^{-1}$ , and then during cooling from  $70^\circ\text{C}$  up to  $35^\circ\text{C}$  at a cooling rate of  $5^\circ\text{C min}^{-1}$ .

**Table S3.** Heating and cooling enthalpies and transition temperatures obtained through micro DSC measurements.

| Sample                           | 1 <sup>st</sup> Heating  |                                          | 1 <sup>st</sup> Cooling  |                                          | 2 <sup>nd</sup> Heating  |                                          | 2 <sup>nd</sup> Cooling  |                                          |
|----------------------------------|--------------------------|------------------------------------------|--------------------------|------------------------------------------|--------------------------|------------------------------------------|--------------------------|------------------------------------------|
|                                  | T <sub>g-s</sub><br>(°C) | $\Delta H_{g-s}$<br>(J g <sup>-1</sup> ) | T <sub>s-g</sub><br>(°C) | $\Delta H_{s-g}$<br>(J g <sup>-1</sup> ) | T <sub>g-s</sub><br>(°C) | $\Delta H_{g-s}$<br>(J g <sup>-1</sup> ) | T <sub>s-g</sub><br>(°C) | $\Delta H_{s-g}$<br>(J g <sup>-1</sup> ) |
| Fmoc-FFpY6.4                     | 62                       | 16.0                                     | 47                       | 19.7                                     | 62                       | 15.8                                     | 46                       | 19.7                                     |
| Fmoc-FFpY6.4/Na <sup>+</sup> 150 | 62                       | 11.3                                     | 47                       | 14.8                                     | 62                       | 10.7                                     | 47                       | 15.0                                     |
| Fmoc-FFpY6.4/Na <sup>+</sup> 250 | 62                       | 5.9                                      | 48                       | 8.0                                      | 62                       | 6.7                                      | 48                       | 8.6                                      |
| Fmoc-FFpY6.4/Na <sup>+</sup> 375 | 53                       | 5.8                                      | 40                       | 10.2                                     | 54                       | 3.8                                      | 44                       | 10.0                                     |
| Fmoc-FFpY6.4/Na <sup>+</sup> 500 | 62                       | 35.4                                     | 45                       | 39.1                                     | 62                       | 34.4                                     | 46                       | 39.5                                     |
